# Supplementary material for: Reverse causal reasoning: applying qualitative causal knowledge to the interpretation of high-throughput data
Source: PubMed Central journal article supplement (PMC4222496; doi:10.1186/1471-2105-14-340), 2013-11-23

# Supplemental Figures

## Figure 5

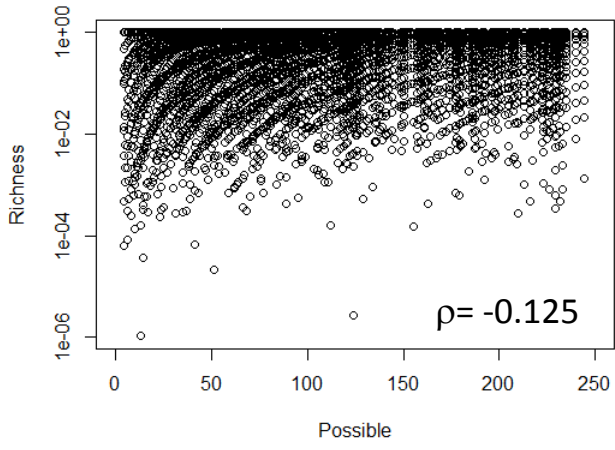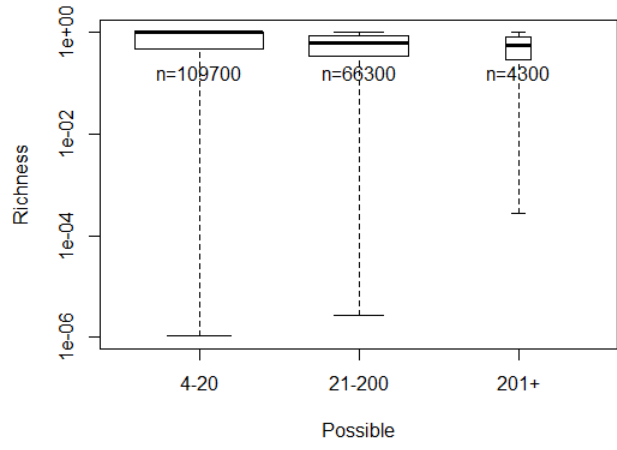

**Figure 6**

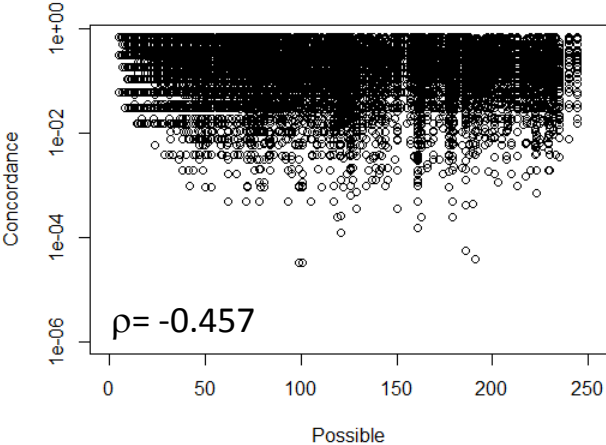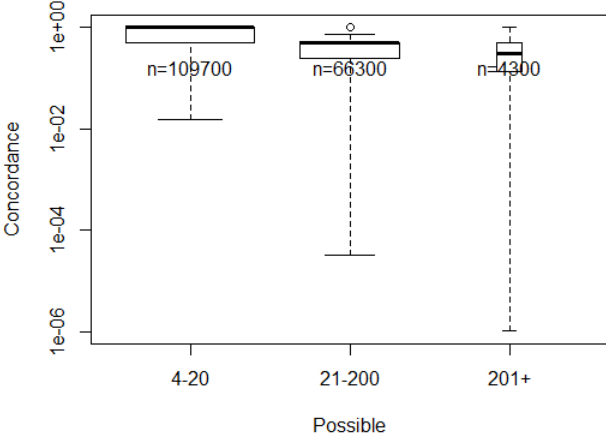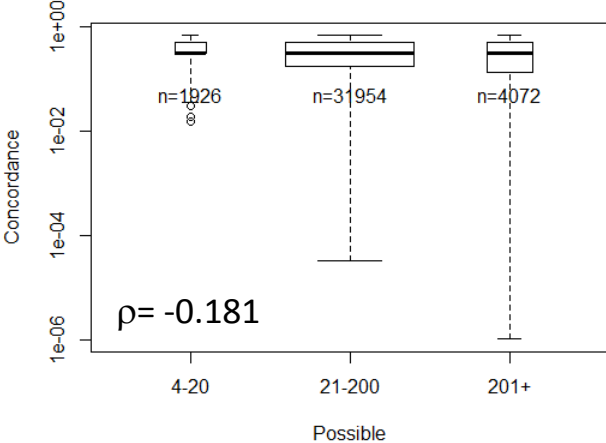

**Figure 7**

### High Fat Diet (E-MEXP-1755)

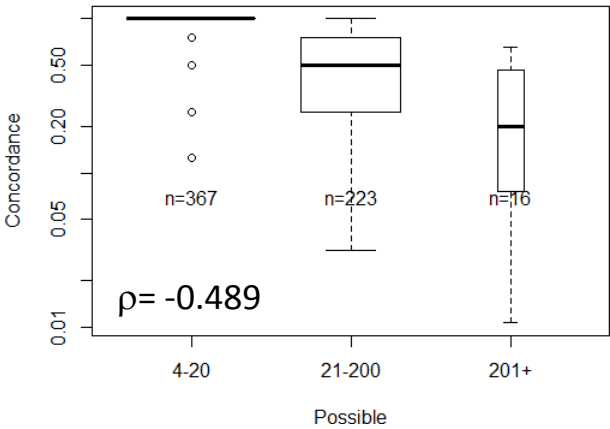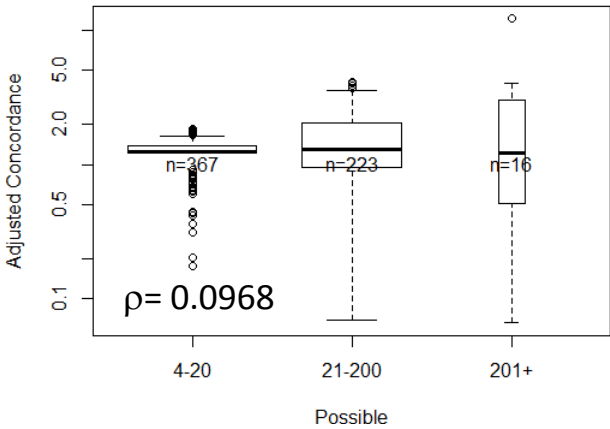

### TNF (GSE2638)

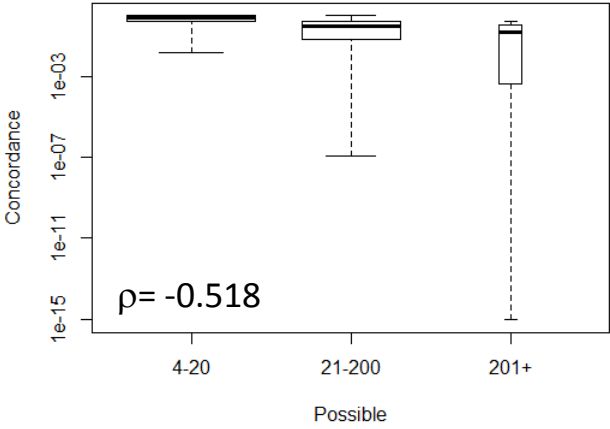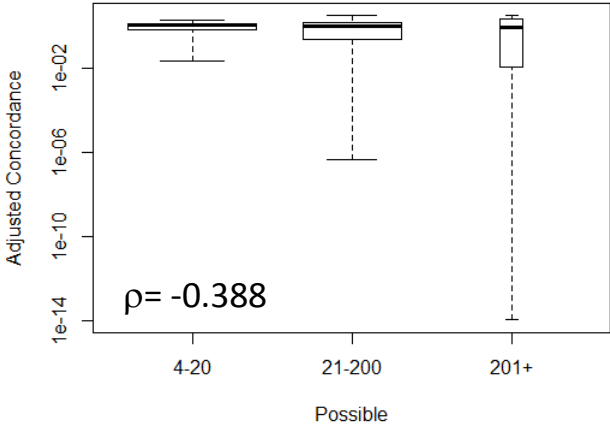

### PI3K Inhibitor (GSE17785)

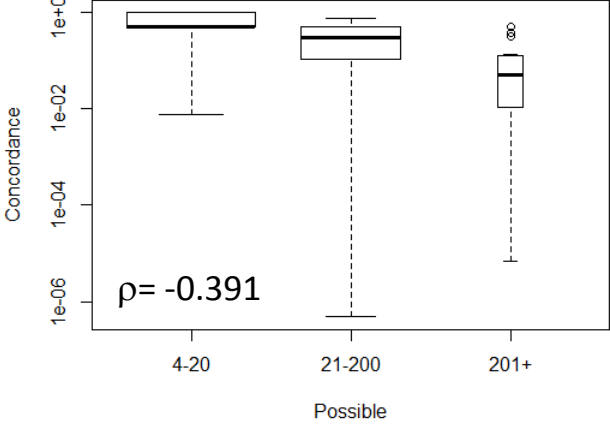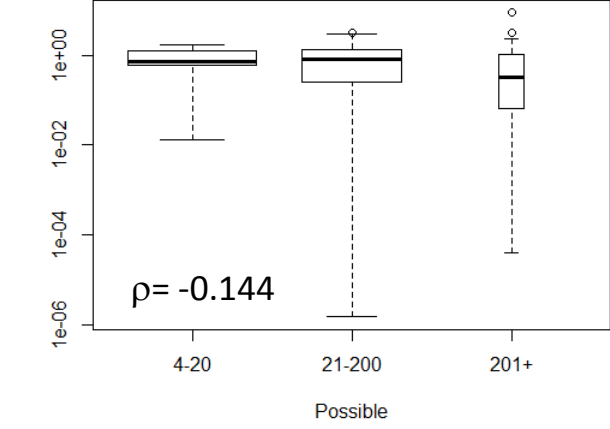

Supplement: 1471-2105-14-340-S3.pdf [file 1471-2105-14-340-S3.pdf]
